# Supplementary material for: Promotion of Cyst Formation from a Renal Stem Cell Line Using Organ-Specific Extracellular Matrix Gel Format Culture System
Source: MDPI journal article supplement (doi:10.3390/gels8050312), 2022-05-19
Supplement: s1 [file s1]

## Article

# Promotion of Cyst Formation from a Renal Stem Cell Line Using Organ-Specific Extracellular Matrix Gel Format Culture System

Yusuke Sakai \*, Yoshihiro Kubo, Nana Shirakigawa, Yoshinori Kawabe, Masamichi Kamihira and Hiroyuki Ijima \*

Department of Chemical Engineering, Faculty of Engineering, Graduate School, Kyushu University, 744 Motoooka, Nishi-ku, Fukuoka 819-0395, Japan; yoshi.mt09sp@gmail.com (Y.K.); nana.shirakigawa@kyudai.jp (N.S.); kawabe@chem-eng.kyushu-u.ac.jp (Y.K.); kamihira@chem-eng.kyushu-u.ac.jp (M.K.)

\* Correspondence: y.sakai.bioeng@gmail.com (Y.S.); ijima@chem-eng.kyushu-u.ac.jp (H.I.)

## Supplementary Information

**Table S1.** Mixing volume ratio for gel preparation.

| Abbreviation | Collagen<br>(3 mg/mL) | K- or L-ECM<br>(9 mg/mL) | 10x MEM | Reconstruction<br>Buffer 1<br>(0.08 M NaOH,<br>0.2 M HEPES) | Reconstruction<br>Buffer 2<br>(0.16 M NaOH,<br>0.2 M HEPES) |
|--------------|-----------------------|--------------------------|---------|-------------------------------------------------------------|-------------------------------------------------------------|
| Collagen     | 8                     | -                        | 1       | 1                                                           | -                                                           |
| K-ECM        | 6                     | 2                        | 1       | -                                                           | 1                                                           |
| L-ECM        | 6                     | 2                        | 1       | -                                                           | 1                                                           |

**Table S2.** TaqMan gene expression assay numbers for real-time PCR analysis.

| Gene Symbol   | Gene Name                                                           | TaqMan Assay No. |
|---------------|---------------------------------------------------------------------|------------------|
| <i>T</i>      | <i>T brachyury transcription factor</i>                             | Cg04449691_g1    |
| <i>Osr1</i>   | <i>Odd-skipped related transcription factor 1</i>                   | Cg04509274_mH    |
| <i>Pax8</i>   | <i>Paired box 8</i>                                                 | Cg00440626_m1    |
| <i>Aqp1</i>   | <i>Aquaporin 1</i>                                                  | Cg04532077_m1    |
| <i>Slc5a1</i> | <i>Solute carrier family 5, member 1</i>                            | Cg04551404_m1    |
| <i>Kcnj1</i>  | <i>Potassium inwardly-rectifying channel, subfamily J, member 1</i> | Cg04642736_s1    |
| <i>Gata3</i>  | <i>GATA binding protein 3</i>                                       | Cg04569191_m1    |
| <i>Aqp2</i>   | <i>Aquaporin 2</i>                                                  | Cg04429866_m1    |
| <i>Gapdh</i>  | <i>Glyceraldehyde-3-phosphate dehydrogenase</i>                     | Cg04424038_gH    |

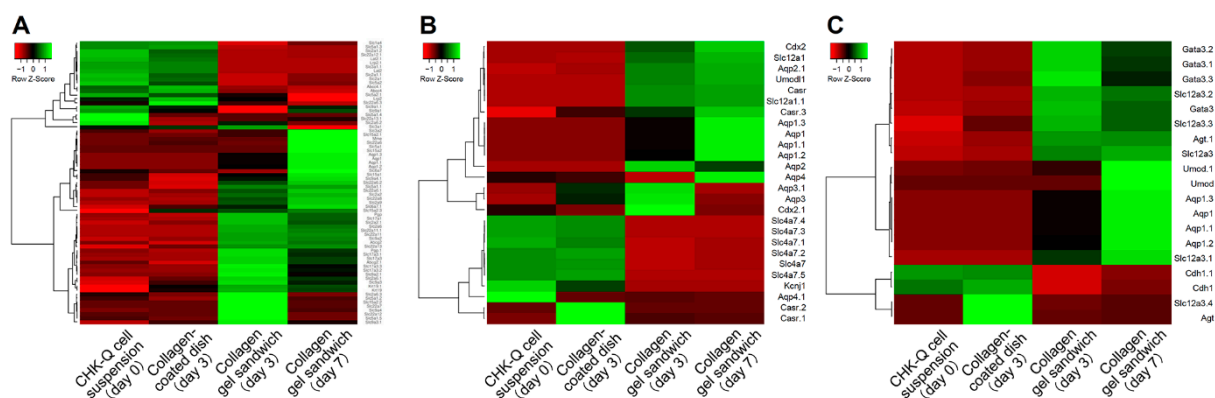

**Figure S1.** Gene expression heat map of (A) proximal tubule, (B) intermediate tubule, and (C) distal tubule in the uriniferous tubule. Pearson correlation was selected as the distance metric; average linkage clustering was selected as the linkage method.
