# Supplementary material for: Promotion of Cyst Formation from a Renal Stem Cell Line Using Organ-Specific Extracellular Matrix Gel Format Culture System
Source: Gels. 2022 May 19;8(5):312. doi: 10.3390/gels8050312 (PMC9140708; doi:10.3390/gels8050312)
Supplement: Supplementary file 1 [file gels-08-00312-s001.zip]

Archive with 4 entries (4 files):
- gels-1706455-supplementary.pdf
- Video S1.mp4
- Video S2 Horizontal-section.mp4
- Video S3 Vertical-section.mp4
